# Supplementary material
Source: MDPI journal article supplement (https://www.mdpi.com/1424-2818/13/10/473)
Supplement: s1 [file s1]

Article

# Impact of Hinoki Cypress Wood on Diversity of Microflora: A Case Study from Owase City Hall

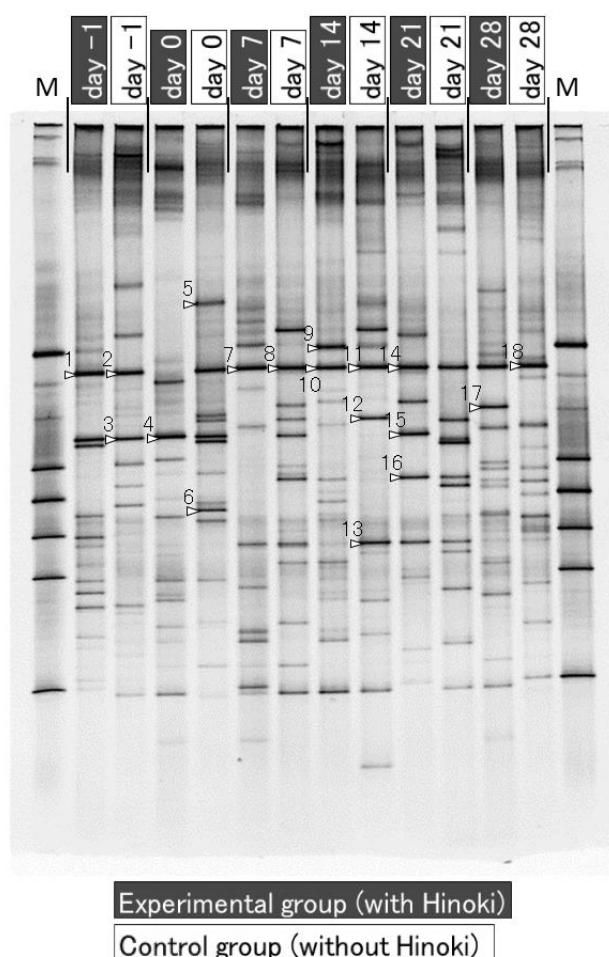

**Figure S1.** Denaturing gradient gel electrophoresis (DGGE) patterns of 16S rRNA gene fragments from air samples collected in rooms with (experimental group) or without (control group) Hinoki cypress material. Lanes marked M represent a DGGE marker lane consisting of 16S rRNA gene sequences from *Staphylococcus* sp., *Exiguobacterium* sp., *Escherichia coli*, *Microbacterium* sp., *Methylobacterium* sp., and *Kocuria* sp. The bands numbered (arrowheads) were excised for the sequence analysis.
